# Supplementary material for: Epidemiological Study Regarding the Incidence of Venous Thromboembolism in Patients After Cancer Remission
Source: Springer Nature journal article supplement (doi:10.1007/s40119-022-00285-3), 2022-11-01
Supplement: MOESM1 [file 23663458]

Epidemiological study regarding the incidence of venous thromboembolism in patients after cancer remission

Miki Imura<sup>1</sup>, Jun Katada<sup>1</sup>, Taro Shiga<sup>2</sup>

<sup>1</sup>Medical Affairs, Internal Medicine, Pfizer Biopharmaceuticals Group, Pfizer Japan Inc., Tokyo, Japan

<sup>2</sup>Department of Onco-Cardiology/Cardiovascular Medicine, The Cancer Institute Hospital of Japanese Foundation for Cancer Research, Tokyo, Japan

**Corresponding author:** Miki Imura

Medical Affairs, Internal Medicine,

Pfizer Biopharmaceuticals Group, Pfizer Japan Inc.

3-22-7, Yoyogi, Shibuya-ku, Tokyo 151-8589 Japan

Phone: +81-80-5001-3070, Fax: +81-3-5309-9198

Email: [miki.imura@pfizer.com](mailto:miki.imura@pfizer.com)

**Supplementary Table 1****Table S1. EphMRA ATC code used for the definition of medications**

| Medications             | EphMRA ATC                                                                                                                                                                                       |
|-------------------------|--------------------------------------------------------------------------------------------------------------------------------------------------------------------------------------------------|
| Alkylating agents       | L01A, trabectedin                                                                                                                                                                                |
| Anti-metabolites        | L01B                                                                                                                                                                                             |
| Microtubule inhibitors  | L01C1,2                                                                                                                                                                                          |
| Cytotoxic antibiotics   | L01C3,4, L01D, sobuzoxane                                                                                                                                                                        |
| PK inhibitor            | L01H                                                                                                                                                                                             |
| Monoclonal antibodies   | L01G1,2,3,4,5, satuximab, inotuzumab, ozogamicin, Lipilimumab (genetic modification), elotuzumab, gemtuzumab, daratumumab, blinatumomab, brentuximab vedotin, polatuzumab vedotin, mogamulizumab |
| Platinum agents         | L01F0                                                                                                                                                                                            |
| Other anti-cancer drugs | L01J, L01X3,4,5,8, procarbazine, L-asparaginase, hydroxycarbamide, estramustine, phosphate arsenic trioxide, venetoclax, tamibarotene, eribulin, forodesin                                       |
| Hormones                | L02A1,2,3, medroxyprogesterone                                                                                                                                                                   |
| Hormone antagonist      | L02B                                                                                                                                                                                             |
| PK, protein kinase      |                                                                                                                                                                                                  |

**Supplementary Table 2****Table S2. International Classification of Disease codes, version 10, used for the definition of comorbidities**

| Diseases                             | ICD-10 codes                                                         |
|--------------------------------------|----------------------------------------------------------------------|
| Malignant tumor                      |                                                                      |
| Oral/esophagus                       | C0, C10, C11, C12, C13, C14, C15, C30, C31, C32                      |
| Stomach                              | C16                                                                  |
| Intestine                            | C17, C18, C19, C20, C21                                              |
| Liver                                | C22, C23, C24                                                        |
| Pancreas                             | C25                                                                  |
| Lung                                 | C33, C34                                                             |
| Thymus/Heart                         | C37, C38                                                             |
| Bone/Joint                           | C40, C41                                                             |
| Skin                                 | C43, C44, C45, C46, C47, C48, C49                                    |
| Breast                               | C50                                                                  |
| Female reproductive                  | C51, C52, C53, C54, C55, C56, C57, C58                               |
| Male reproductive                    | C60, C61, C62, C63                                                   |
| Kidney                               | C64, C65, C66, C67, C68                                              |
| CNS                                  | C69, C70, C71, C72                                                   |
| Endocrine                            | C73, C74, C75                                                        |
| Lymph/blood                          | C81, C82, C83, C84, C85, C86, C87, C88, C90, C91, C92, C94, C95, C96 |
| Comorbidities                        |                                                                      |
| Sepsis                               | A021, A207, A227, A267, A327, A40, A41, A427, B377                   |
| Coagulopathy                         | D65, C66, C67, C68, C69                                              |
| Diabetes mellitus                    | E11, E12, E13, E14                                                   |
| Diabetes mellitus with complications | E11, E12, E13, E14, E25, E27                                         |
| Dyslipidemia                         | E78                                                                  |
| Stress                               | F43                                                                  |
| Sleep disorder                       | G47                                                                  |
| Hypertension                         | I10, I11, I12, I13, I14, I15                                         |
| Angina                               | I20                                                                  |
| Previous myocardial infarction       | I21, I22, I23, I252                                                  |
| Pulmonary embolism                   | I26                                                                  |
| Deep vein thrombosis                 | I80, I81, I82, O222, O223, O225, O870, O871, O887                    |
| Pericarditis                         | I30, I31, I32, I33, I38, I398                                        |
| Valvular disease                     | I05, I06, I07, I08, I34, I35, I36, I37, I390, I391, I392, I393, I394 |
| Cardiomyopathy                       | I40, I41, I42, I43, I012, I090, I255, I514                           |
| Atrial fibrillation                  | I480, I481, I482, I489                                               |
| Conduction failure                   | I44, I45, I47, I483, I484, I49                                       |
| Heart failure                        | I50, I110, I130, I132                                                |
| Stroke                               |                                                                      |
| Intracerebral hemorrhage             | I60, I61, I62, I690, I691, I692                                      |
| Ischemic stroke                      | I63, I693                                                            |
| Atheroma                             | I70                                                                  |
| Peripheral thrombosis                | I742, I743, I744, I745, I746, I747, I748, I749, I80, I82             |
| Peptic ulcer                         | K25, K26, K27, K28                                                   |
| Gastritis                            | K29, K30                                                             |

|                       |                                                                                                   |
|-----------------------|---------------------------------------------------------------------------------------------------|
| Mild liver disease    | B18, K700, K703, K709, K713, K714, K715, K716, K73, K74, K760, K762, K763, K764, K768, K769, Z955 |
| Moderate/Severe liver | I850, I859, I864, I982, K704, K711, K721, K729, K765, K766, K767                                  |
| Rheumatic disease     | M05, M06, M315, M32, M33, M34, M351, M353, M360                                                   |
| Renal disease         | I120, I131, N02, N03, N04, N05, N06, N07, N18, N19, N250, Z490, Z491, Z492, Z940, Z992            |

---

ICD, International Classification of Disease; CNS, central nervous system

**Supplementary Table 3****Table S3. Definitions of anticancer treatment for malignant tumor**

| Class                   | Procedure                                                                                                                                                                                           |
|-------------------------|-----------------------------------------------------------------------------------------------------------------------------------------------------------------------------------------------------|
| Cancer surgery          | tumor (surgery, extirpation   excision)   excision  <br>decollement   extirpation                                                                                                                   |
| Stem cell transplant    | Stem cell transplant, with lymphadenectomy dissection  <br>dissection   with dissection   dissection Concomitant<br>application                                                                     |
| Radiation etc.          | Radio wave   Microwave   Photodynamics  <br>Electromagnetic wave   Radiation source treatment   Laser<br>  Particle beam therapy   Extracorporeal irradiation   Linear<br>accelerator   Gamma knife |
| Topical administration  | Local continuous injection   Anti-malignant tumor agent                                                                                                                                             |
| Outpatient chemotherapy | Outpatient chemotherapy                                                                                                                                                                             |
| Cancer pain             | Cancer pain management fee                                                                                                                                                                          |
| Cancer rehabilitation   | Cancer patient rehabilitation fee                                                                                                                                                                   |

**Supplementary Table 4****Table S4. Patient characteristics**

| Variables                      | Entire cohort<br>(N=638,908) | Patients without VTE<br>(N=633,375) | Patients with VTE<br>(N=5,533)<br>(PE: 779, DVT: 5,084) | P      |
|--------------------------------|------------------------------|-------------------------------------|---------------------------------------------------------|--------|
| <b>Demographics</b>            |                              |                                     |                                                         |        |
| Male                           | 328,426 (51.4)               | 325,798 (51.4)                      | 2,628 (47.5)                                            | <0.001 |
| Age (years)                    | 67.8±13.4                    | 67.8±13.4                           | 70.1±12.5                                               | <0.001 |
| <b>Comorbidity</b>             |                              |                                     |                                                         |        |
| Sepsis                         | 8,471 (1.3)                  | 8,343 (1.3)                         | 128 (2.3)                                               | <0.001 |
| Coagulopathy                   | 26,069 (4.1)                 | 25,630 (4.0)                        | 439 (7.9)                                               | <0.001 |
| Diabetes mellitus              | 142,749 (22.3)               | 141,090 (22.3)                      | 1,659 (30.0)                                            | <0.001 |
| Diabetes mellitus+             | 19,578 (3.1)                 | 19,270 (3.0)                        | 308 (5.6)                                               | <0.001 |
| Dyslipidemia                   | 103,527 (16.2)               | 102,349 (16.2)                      | 1,178 (21.3)                                            | <0.001 |
| Sleep disorder                 | 102,970 (16.1)               | 101,802 (16.1)                      | 1,168 (21.1)                                            | <0.001 |
| Hypertension                   | 200,755 (31.4)               | 198,414 (31.3)                      | 2,341 (42.3)                                            | <0.001 |
| Angina                         | 48,515 (7.6)                 | 47,798 (7.5)                        | 717 (13.0)                                              | <0.001 |
| Previous myocardial infarction | 10,959 (1.7)                 | 10,799 (1.7)                        | 160 (2.9)                                               | <0.001 |
| Pulmonary embolism             | 1,379 (0.2)                  | 1,288 (0.2)                         | 91 (1.6)                                                | <0.001 |
| Deep vein thrombosis           | 15,881 (2.5)                 | 15,218 (2.4)                        | 663 (12.0)                                              | <0.001 |
| Pericarditis                   | 5,412 (0.8)                  | 5,312 (0.8)                         | 100 (1.8)                                               | <0.001 |
| Valvular disease               | 30,282 (4.7)                 | 29,887 (4.7)                        | 395 (7.1)                                               | <0.001 |
| Cardiomyopathy                 | 2,871 (0.4)                  | 2,821 (0.4)                         | 50 (0.9)                                                | <0.001 |
| Atrial fibrillation            | 15,423 (2.4)                 | 15,186 (2.4)                        | 237 (4.3)                                               | <0.001 |

|                              |                |                |              |        |
|------------------------------|----------------|----------------|--------------|--------|
| Conduction failure           | 36,455 (5.7)   | 36,029 (5.7)   | 426 (7.7)    | <0.001 |
| Heart failure                | 45,323 (7.1)   | 44,551 (7.0)   | 772 (14.0)   | <0.001 |
| Stroke                       | 34,164 (5.3)   | 33,751 (5.3)   | 413 (7.5)    | <0.001 |
| Intracerebral hemorrhage     | 4,342 (0.7)    | 4,276 (0.7)    | 66 (1.2)     | <0.001 |
| Ischemic stroke              | 30,731 (4.8)   | 30,366 (4.8)   | 365 (6.6)    | <0.001 |
| Atheroma                     | 11,870 (1.9)   | 11,655 (1.8)   | 215 (3.9)    | <0.001 |
| Peripheral thrombosis        | 20,370 (3.2)   | 19,666 (3.1)   | 704 (12.7)   | <0.001 |
| Peptic ulcer                 | 142,027 (22.2) | 140,565 (22.2) | 1,462 (26.4) | <0.001 |
| Gastritis                    | 146,657 (23.0) | 145,144 (22.9) | 1,513 (27.3) | <0.001 |
| Mild liver                   | 74112 (11.6)   | 73178 (11.6)   | 934 (16.9)   | <0.001 |
| Moderate/Severe liver        | 6,997 (1.1)    | 6,814 (1.1)    | 183 (3.3)    | <0.001 |
| Rheumatic Disease            | 9,471 (1.5)    | 9,289 (1.5)    | 182 (3.3)    | <0.001 |
| Renal disease                | 22,128 (3.5)   | 21,761 (3.4)   | 367 (6.6)    | <0.001 |
| <b>Medications</b>           |                |                |              |        |
| Heparin                      | 196,882 (30.8) | 194,637 (30.7) | 2,245 (40.6) | <0.001 |
| Low-molecular-weight heparin | 37,734 (5.9)   | 37,279 (5.9)   | 455 (8.2)    | <0.001 |
| Fondaparinux                 | 2,109 (0.3)    | 2,067 (0.3)    | 42 (0.8)     | <0.001 |
| Anti-platelet drugs          | 58,565 (9.2)   | 57,829 (9.1)   | 736 (13.3)   | <0.001 |
| Thrombolytics                | 533 (0.1)      | 520 (0.1)      | 13 (0.2)     | <0.001 |
| Warfarin                     | 1768 (0.3)     | 1687 (0.3)     | 81 (1.5)     | <0.001 |
| Thrombin inhibitors          | 717 (0.1)      | 701 (0.1)      | 16 (0.3)     | <0.001 |
| FXa inhibitors               | 3,723 (0.6)    | 3,574 (0.6)    | 149 (2.7)    | <0.001 |
| other anticoagulants         | 3,479 (0.5)    | 3,422 (0.5)    | 57 (1.0)     | <0.001 |

|                       |                |                |              |        |
|-----------------------|----------------|----------------|--------------|--------|
| Female hormone        | 5,964 (0.9)    | 5,886 (0.9)    | 78 (1.4)     | <0.001 |
| NSAIDs                | 366,482 (57.4) | 363,094 (57.3) | 3,388 (61.2) | <0.001 |
| Anti-arrhythmic drugs | 79,097 (12.4)  | 78,222 (12.4)  | 875 (15.8)   | <0.001 |
| Digitalis             | 2,892 (0.5)    | 2,843 (0.4)    | 49 (0.9)     | <0.001 |

---

FXa, factor Xa; NSAIDs, nonsteroidal anti-inflammatory drugs; VTE, venous thromboembolism; DVT, deep venous thrombosis

“Diabetes mellitus +” was identified as diabetic with complications (E110, E111, E112, E113, E114, E115, E116, E117, E130, E131, E132, E133, E134, E135, E136, E137, E141, E142, E143, E144, E145, E146)

Female hormone; G03C0, G03D0, G03E0, G03F0, G03J0,

Hormone antagonist; L02B
